# Supplementary material for: The telomeric DNA damage response occurs in the absence of chromatin decompaction
Source: PubMed Central journal article supplement (PMC5393052; doi:10.1101/gad.294082.116), 2017-03-15
Supplement: supp_gad.294082.116_Supplemental_Fig_S2.pdf [file supp_gad.294082.116_Supplemental_Fig_S2.pdf]

**A**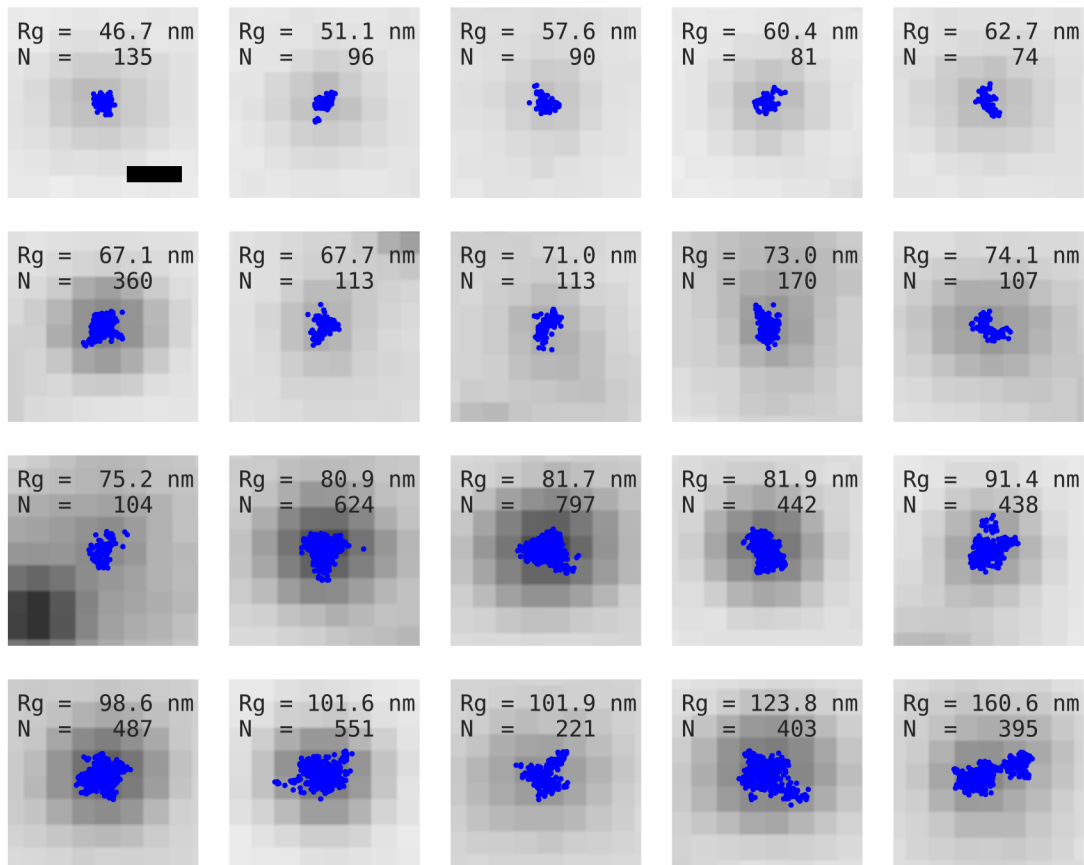**B**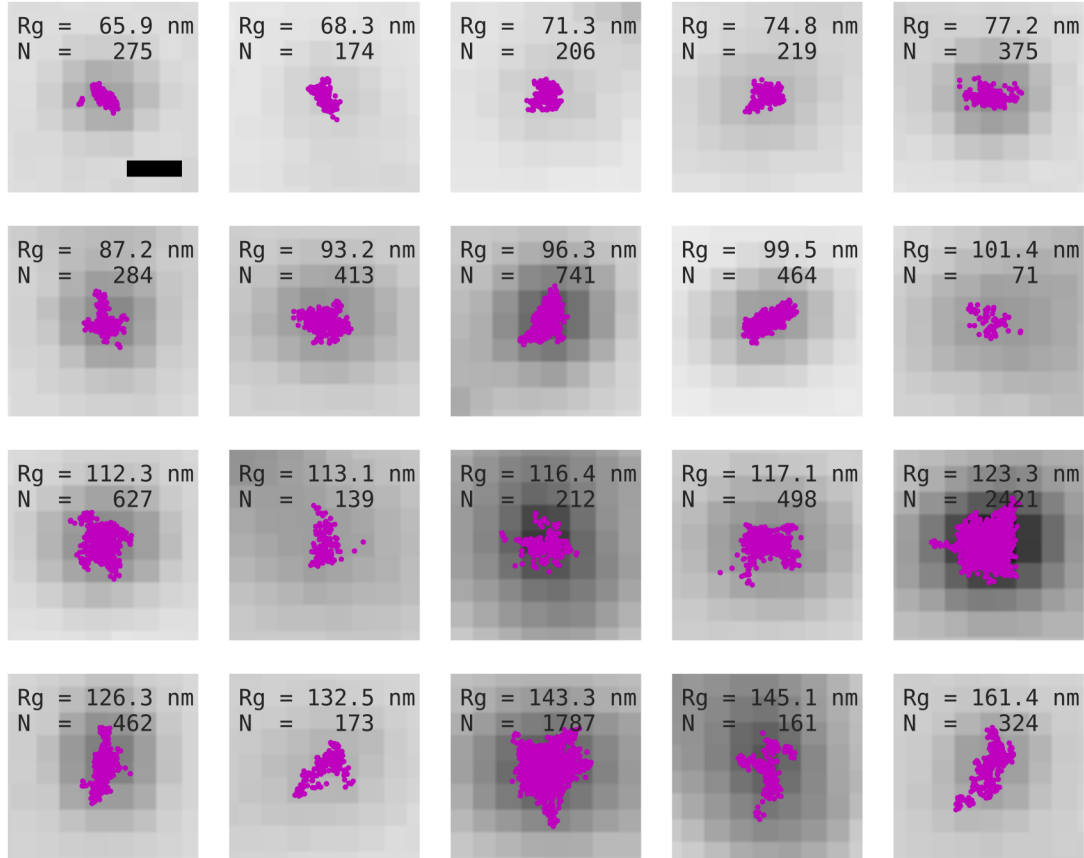

**Supplemental Figure S2:** Visual comparison of telomeres from populations with different mean lengths.

(A) Scatter plots of localizations overlaid on the corresponding widefield images of twenty telomeres drawn randomly from the HeLa S population of Figure 1. (B) Twenty clusters randomly drawn from the HeLa L population of Figure 1. Rg: radius of gyration. N: number of localizations. Scale bars: 250 nm.
