# Supplementary material for: The telomeric DNA damage response occurs in the absence of chromatin decompaction
Source: PubMed Central journal article supplement (PMC5393052; doi:10.1101/gad.294082.116), 2017-03-15
Supplement: supp_gad.294082.116_Supplemental_Fig_S4.pdf [file supp_gad.294082.116_Supplemental_Fig_S4.pdf]

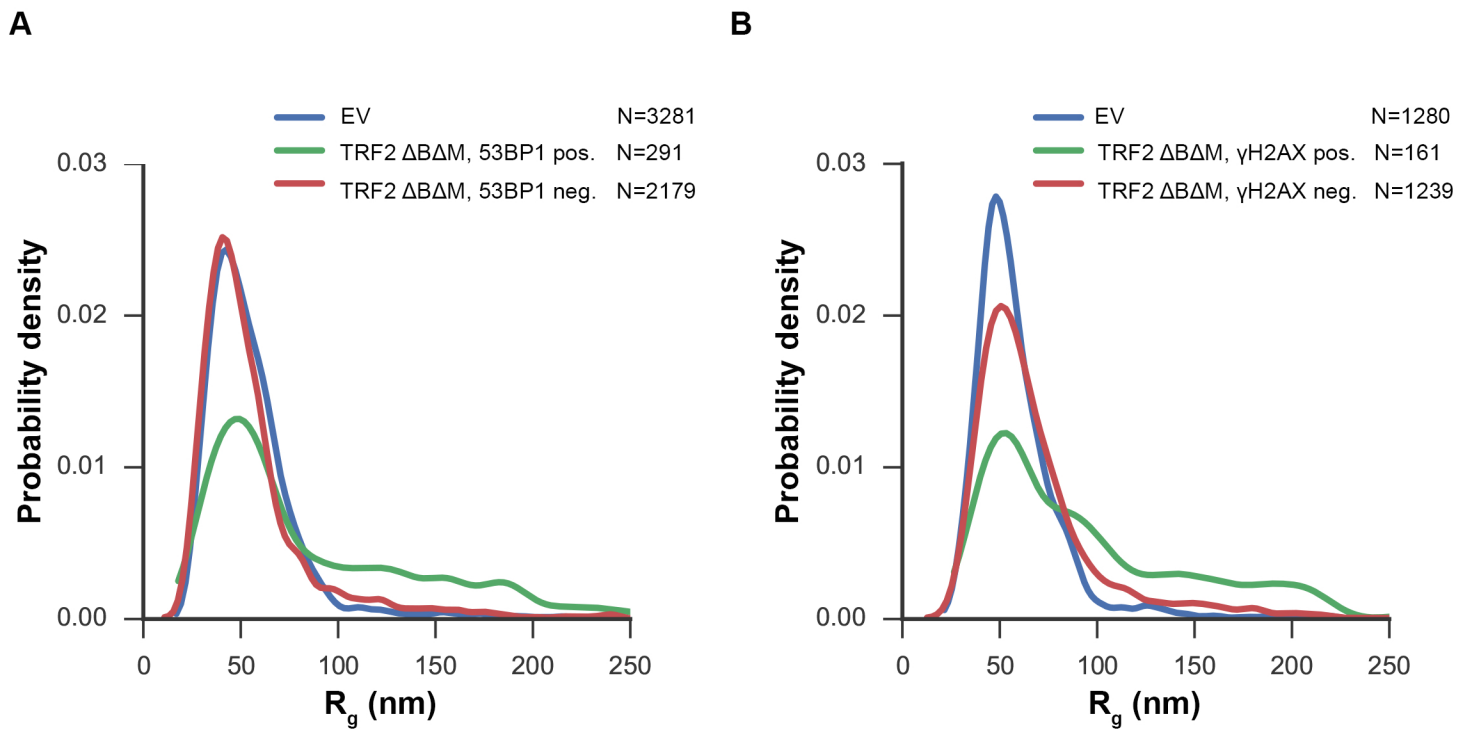

**Supplemental Figure S4:** Selection of DDR positive telomeres of TRF2 $\Delta$ B $\Delta$ M transfected HeLa S cells with two markers (53BP1 and  $\gamma$ -H2AX) reveals increase in telomeres size in only a small subset of telomeres.

(A) Representative  $R_g$  distributions of telomeric (CCCTAA)<sub>3</sub>-FISH and 53BP1 labeled samples obtained by analysis of STORM data in HeLaS cells transfected with TRF2  $\Delta$ B $\Delta$ M and empty vector control (EV). (B) Representative  $R_g$  distributions of telomeric (CCCTAA)<sub>3</sub>-FISH and  $\gamma$ H2AX labeled samples obtained by analysis of STORM data in HeLaS transfected with TRF2  $\Delta$ B $\Delta$ M and empty vector control (EV).
