# Supplementary material for: The telomeric DNA damage response occurs in the absence of chromatin decompaction
Source: PubMed Central journal article supplement (PMC5393052; doi:10.1101/gad.294082.116), 2017-03-15
Supplement: supp_gad.294082.116_Supplemental_Fig_S5.pdf [file supp_gad.294082.116_Supplemental_Fig_S5.pdf]

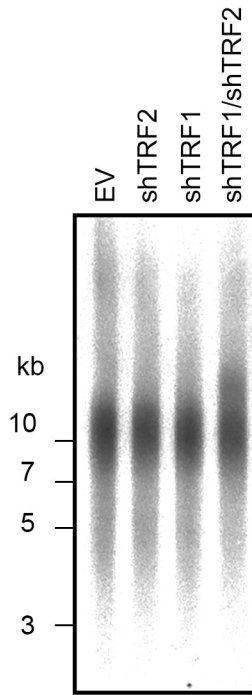

**Supplemental Figure S5:** Telomere restriction fragment (TRF) length analysis of HeLaS cells depleted for TRF1 and TRF2.
