# Supplementary material for: The telomeric DNA damage response occurs in the absence of chromatin decompaction
Source: PubMed Central journal article supplement (PMC5393052; doi:10.1101/gad.294082.116), 2017-03-15
Supplement: supp_gad.294082.116_Supplemental_Fig_S6.pdf [file supp_gad.294082.116_Supplemental_Fig_S6.pdf]

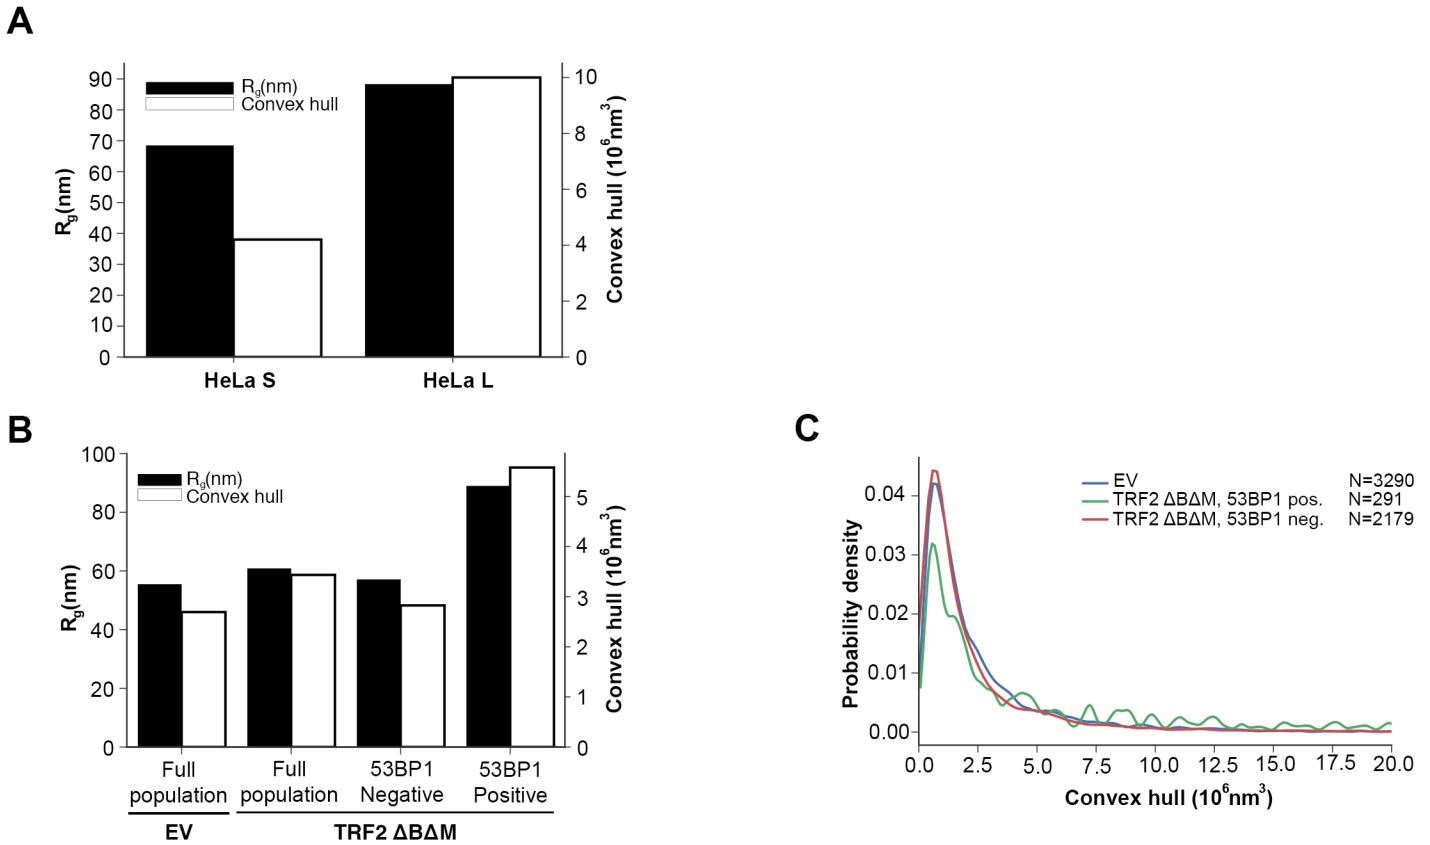

**Supplemental Figure S6:** Comparison of radius of gyration and convex hull measurements of telomere size.

(A) Average radius of gyration ( $R_g$ ) and average convex hull volume of telomeric  $(CCCTAA)_3$ -FISH labeled HeLaS and HeLaL cell lines obtained by analysis of STORM data shown in Figure 1. (B) Average radius of gyration ( $R_g$ ) and average convex hull volume of telomeric  $(CCCTAA)_3$ -FISH and 53BP1 labeled samples obtained by analysis of STORM data in HeLaS transfected with TRF2  $\Delta B\Delta M$  and empty vector control (EV). Data shown is from experiment in Supplementary Figure S4. (C) Representative convex hull distributions of telomeric  $(CCCTAA)_3$ -FISH and 53BP1 labeled samples obtained by analysis of STORM data in HeLaS cells transfected with TRF2  $\Delta B\Delta M$  and empty vector control (EV).
